# Supplementary material for: Transcriptome Analysis of Soybean Leaf Abscission Identifies Transcriptional Regulators of Organ Polarity and Cell Fate
Source: Front Plant Sci. 2016 Feb 17;7:125. doi: 10.3389/fpls.2016.00125 (PMC4756167; doi:10.3389/fpls.2016.00125)
Supplement: Table S5 — Excel file giving additional information on ATRM genes used for transcriptional networks. [file Table5.xlsx]

## Sheet: Arabidopsis TF list
Table S5. Excel file giving additional information on ATRM genes used for transcriptional networks. Arabidopsis homologues of soybean TFs identified in RNA-seq are highlighed. Arabidopsis TFs that were found in the high-confidence regulatory data set were used in the generation of the transcription network (Jin et al., 2015).
TF ID	Target ID	TF alias	Target alias	Activate/Repress	Reference
AT3G24650	AT1G03790	ABI3	SOM	A	21467583
AT2G45190	AT4G18960	AFO	AG	R	16714408
AT2G45190	AT5G60910	AFO	AGL8	A	17023565, 16192305, 19052256
AT2G45190	AT1G69120	AFO	AP1	A	10323860, 9878633
AT2G45190	AT2G34710	AFO	PHB	A	18184731
AT2G45190	AT2G42830	AFO	SHP2	A	17023565
AT5G10510	AT4G18960	AIL6	AG	A	19542297
AT1G32770	AT4G28500	ANAC012	ANAC073	A	18952777
AT1G32770	AT5G16600	ANAC012	MYB43	A	18952777
AT1G32770	AT1G17950	ANAC012	MYB52	A	18952777
AT2G02450	AT5G15840	ANAC034	CO	R	17653269
AT4G37750	AT2G45190	ANT	AFO	A	17023565, 16714408, 18184731
AT4G37750	AT4G18960	ANT	AG	R	12826617, 19542297, 10948255, 10215627, 16714408, 11041883, 15020744
AT4G37750	AT3G54340	ANT	AP3	A	16714408, 11935018
AT4G37750	AT1G69180	ANT	CRC	R	18184731
AT4G37750	AT4G34160	ANT	CYCD3;1	A	17726100, 16824178, 18410478, 15937226
AT4G37750	AT1G23420	ANT	INO	A	17666023, 12183381, 17693535, 15131247, 10601041, 14731261
AT4G37750	AT5G61850	ANT	LFY	A	19542297
AT4G37750	AT2G34710	ANT	PHB	A	16714408, 18184731
AT4G37750	AT5G60690	ANT	REV	A	18184731
AT4G37750	AT4G27330	ANT	SPL	A	10976054
AT4G37750	AT4G00180	ANT	YAB3	A	16714408
AT4G36920	AT1G79840	AP2	GL2	A	14701918, 19401413
AT4G36920	AT2G37260	AP2	TTG2	A	14701918
AT3G54340	AT5G56860	AP3	GNC	R	18417639
AT3G54340	AT4G26150	AP3	GNL	R	18417639
AT1G19220	AT4G14550	ARF19	IAA14	R	16236149
AT5G62000	AT4G37750	ARF2	ANT	R	19542297
AT5G20730	AT4G14550	ARF7	IAA14	R	16236149
AT5G20730	AT3G15540	ARF7	IAA19	A	14729917, 15923351, 12114578, 16632588
AT5G37020	AT2G44810	ARF8	DAD1	A	20007966
AT5G37020	AT5G54510	ARF8	DFL1	A	16598073, 15469491
AT5G37020	AT1G28130	ARF8	GH3.17	A	16598073, 15469491
AT2G37630	AT2G45190	AS1	AFO	R	16682355
AT2G37630	AT3G15170	AS1	CUC1	R	18156293
AT2G37630	AT5G53950	AS1	CUC2	R	18156293
AT2G37630	AT2G33860	AS1	ETT	R	17559509
AT2G37630	AT1G32240	AS1	KAN2	R	17559509
AT2G37630	AT4G08150	AS1	KNAT1	R	18203921, 11934861, 19088331, 16971475, 11917137, 17873098, 15833920, 17592013, 16166385
AT2G37630	AT1G70510	AS1	KNAT2	R	18203921, 11934861, 12401187, 19088331, 11283332, 11917137, 15833920, 19891706, 14871310, 17259263, 14508003, 12586863, 17601823, 16166385
AT2G37630	AT1G23380	AS1	KNAT6	R	14508003, 17601823, 15749758
AT2G37630	AT5G63090	AS1	LOB	A	17601823
AT2G37630	AT2G34710	AS1	PHB	A	16006579, 15208415, 17028202
AT2G37630	AT5G03680	AS1	PTL	R	18156293
AT2G37630	AT2G26580	AS1	YAB5	R	17559509
AT1G65620	AT2G45190	AS2	AFO	R	14508003
AT1G65620	AT1G23380	AS2	KNAT6	R	14508003, 17601823
AT1G65620	AT5G03680	AS2	PTL	R	18156293
AT1G65620	AT2G26580	AS2	YAB5	R	17559509
AT3G01470	AT2G19590	ATHB-1	ATACO1	A	19880793, 19891701
AT3G01470	AT1G07900	ATHB-1	LBD1	R	20675575
AT4G32880	AT4G37650	ATHB8	SHR	A	21128301
AT5G42630	AT1G23420	ATS/KAN4	INO	R	15299139, 19054366
AT5G42630	AT1G73590	ATS/KAN4	PIN1	R	17307928
AT5G41410	AT4G18960	BEL1	AG	R	10377998, 7912435, 17693535, 17461793
AT5G41410	AT1G23420	BEL1	INO	A	17666023, 12183381, 17693535, 10601041, 14731261
AT5G41410	AT2G17950	BEL1	WUS	R	19704643, 17693535
AT1G19350	AT2G43060	BES1	IBH1	A	20009022
AT1G62360	AT2G37630	BUM1	AS1	R	11934861, 17768399, 11447101, 11283332, 15202996, 14617069, 12068116, 15316113, 17601823, 12045283
AT1G62360	AT1G23380	BUM1	KNAT6	A	14617069, 16798887
AT1G75080	AT2G43060	BZR1	IBH1	A	20009022
AT2G46410	AT1G79840	CPC	GL2	R	12403712, 12756173, 12356720, 18266916, 17644729, 16207757, 17027738, 15542499
AT2G46410	AT2G37260	CPC	TTG2	R	17766401
AT3G15170	AT1G23380	CUC1	KNAT6	A	16798887
AT5G53950	AT1G23380	CUC2	KNAT6	A	16798887
AT1G63650	AT1G79840	EGL3	GL2	A	19136646, 19401413, 17885086, 17644729, 14627722, 17461792, 15542499
AT1G63650	AT2G37260	EGL3	TTG2	A	17766401
AT1G04370	AT2G44840	ERF14	ERF13	A	11950980
AT1G01380	AT1G79840	ETC1	GL2	R	15342905
AT2G33860	AT2G45190	ETT	AFO	A	18753245, 16682355
AT2G33860	AT4G36930	ETT	SPT	R	16682356, 20176890, 16055634, 16740145
AT3G27920	AT1G79840	GL1	GL2	A	9477315, 12974811, 19395683, 17885086, 15584952, 18948276
AT3G27920	AT2G37260	GL1	TTG2	A	17766401
AT1G79840	AT1G12560	GL2	EXPA7	R	12468740
AT1G79840	AT1G53500	GL2	MUM4	A	14701918, 19401413, 19458117
AT1G79840	AT3G16785	GL2	PLDP1	R	16219918, 16384909
AT1G79840	AT5G53200	GL2	TRY	A	19014692
AT1G79840	AT5G14750	GL2	WER	R	12756173
AT5G41315	AT1G79840	GL3	GL2	A	18711121, 12974811, 17885086, 17644729, 15584952, 17461792, 18948276
AT5G41315	AT2G37260	GL3	TTG2	A	17766401
AT5G56860	AT4G35770	GNC	SEN1	A	18417639
AT5G56860	AT5G26340	GNC	AtSTP13	D	18417639		flower: R, leaf: A
AT5G56860	AT4G29130	GNC	HXK1	R	18417639
AT5G56860	AT2G15890	GNC	MEE14	R	18417639
AT5G56860	AT4G30270	GNC	MERI5B	A	18417639
AT5G56860	AT1G57990	GNC	PUP18	A	18417639
AT5G56860	AT2G29350	GNC	SAG13	A	18417639
AT4G26150	AT4G35770	GNL	SEN1	A	18417639
AT4G26150	AT5G26340	GNL	AtSTP13	D	18417639		flower: R, leaf: A
AT4G26150	AT4G29130	GNL	HXK1	R	18417639
AT4G26150	AT2G15890	GNL	MEE14	D	18417639		flower: R, leaf: A
AT4G26150	AT4G30270	GNL	MERI5B	A	18417639
AT4G26150	AT1G57990	GNL	PUP18	A	18417639
AT4G26150	AT2G29350	GNL	SAG13	A	18417639
AT5G03790	AT1G26310	HB51	CAL	A	18298668, 16554366, 19291320, 18694458
AT3G44750	AT2G45190	HDA3	AFO	A	17293570
AT5G11260	AT4G32880	HY5	ATHB8	A	11402194
AT5G11260	AT4G14550	HY5	IAA14	A	15078335
AT5G11260	AT3G23050	HY5	IAA7	A	15078335, 17419844
AT3G26744	AT3G61190	ICE1	BAP1	A	21098676
AT3G26744	AT4G25490	ICE1	CBF1	A	16896234, 12672693
AT3G26744	AT4G25470	ICE1	CBF2	A	12672693
AT3G26744	AT4G25480	ICE1	CBF3	A	21486303, 17416732, 16702557, 14673035, 12672693, 16214899, 17015446
AT3G26744	AT2G42540	ICE1	COR15A	A	12672693
AT3G26744	AT5G52310	ICE1	LTI78	A	12672693
AT3G26744	AT3G23250	ICE1	MYB15	R	17416732, 19211694, 19704769, 17015446
AT3G26744	AT5G53210	ICE1	SPCH	A	18641265
AT4G00120	AT4G36930	IND	SPT	A	20176890
AT1G23420	AT4G37750	INO	ANT	A	15131247
AT1G23420	AT1G23420	INO	INO	A	15131247, 10601041, 12183380, 14731261, 15299139
AT1G23420	AT4G27330	INO	SPL	A	10976054
AT5G03150	AT3G54220	JKD	SCR	A	17785527
AT4G00220	AT2G37630	JLO	AS1	R	17557810
AT1G55580	AT4G37750	LAS	ANT	A	16473968
AT1G55580	AT2G37630	LAS	AS1	A	16473968
AT1G28300	AT3G62100	LEC2	IAA30	A	16492731
AT5G61850	AT5G03790	LFY	HB51	A	18298668, 19291320, 18694458
AT1G19850	AT4G32880	MP	ATHB8	A	20592815, 19901531, 19710171
AT3G23250	AT4G25490	MYB15	CBF1	R	19270185, 19270186
AT3G23250	AT4G25470	MYB15	CBF2	R	19270185, 19270186
AT3G23250	AT4G25480	MYB15	CBF3	R	17416732, 19270185, 19270186, 19704769, 17015446
AT5G40330	AT1G79840	MYB23	GL2	A	12787253, 19395683
AT5G23000	AT4G37750	MYB37	ANT	A	16473968
AT5G23000	AT2G37630	MYB37	AS1	A	16473968
AT4G28110	AT4G05100	MYB41	MYB74	R	19211694
AT3G13540	AT1G79840	MYB5	GL2	A	19136646, 19401413
AT3G13540	AT2G37260	MYB5	TTG2	A	17766401, 18992236
AT1G56650	AT2G37260	MYB75	TTG2	A	17766401
AT1G66390	AT2G37260	MYB90	TTG2	A	17766401
AT1G71030	AT1G79840	MYBL2	GL2	R	19136646, 12056412
AT2G34710	AT2G45190	PHB	AFO	A	11525739
AT5G20240	AT5G56860	PI	GNC	R	18417639
AT5G20240	AT4G26150	PI	GNL	R	18417639
AT5G61270	AT4G25490	PIF7	CBF1	R	19837816
AT5G61270	AT4G25470	PIF7	CBF2	R	19837816
AT2G20180	AT3G04730	PIL5	IAA16	R	19244139
AT2G20180	AT1G66350	PIL5	RGL1	R	19244139
AT2G20180	AT1G03790	PIL5	SOM	A	18487351
AT5G03680	AT5G06070	PTL	RBE	A	20409275
AT1G66350	AT2G41940	RGL1	ZFP8	R	17704233
AT3G54220	AT5G03150	SCR	JKD	A	17785527
AT3G54220	AT1G03840	SCR	MGP	A	17785527
AT3G54220	AT3G12280	SCR	RBR1	A	16377572
AT4G37650	AT3G54220	SHR	SCR	A	20410882, 11672520, 14623445, 17933900, 15454085, 17785527, 15125773, 15542499
AT5G53210	AT3G26744	SPCH	ICE1	A	18641265
AT4G27330	AT1G23420	SPL	INO	R	17666023, 12183381, 17693535, 10601041, 15131247, 14731261, 15299139, 15328016
AT4G36930	AT1G15550	SPT	GA3OX1	R	16303558, 17023565, 17933900, 17461781, 18315540, 18422904, 17238911
AT4G36930	AT1G80340	SPT	GA3OX2	R	16303558, 18315540
AT4G36930	AT4G36260	SPT	STY2	A	20176890, 18315540
AT3G23130	AT1G23420	SUP	INO	R	15131247, 10601041, 12183380, 14731261, 15299139
AT1G67260	AT3G50660	TCP1	DWF4	A	20435901
AT1G53230	AT2G37630	TCP3	AS1	A	21119060
AT5G53200	AT1G79840	TRY	GL2	R	15342905, 12356720
AT5G53200	AT2G37260	TRY	TTG2	R	17766401
AT5G35550	AT1G79840	TT2	GL2	A	19401413
AT5G35550	AT2G37260	TT2	TTG2	A	17766401, 18992236
AT4G09820	AT1G79840	TT8	GL2	A	19136646, 19401413
AT4G09820	AT2G37260	TT8	TTG2	A	17766401
AT2G37260	AT1G79840	TTG2	GL2	A	17766401
AT2G37260	AT2G37260	TTG2	TTG2	A	17766401
AT5G14750	AT1G79840	WER	GL2	A	10589676, 12756173, 17644729, 17766401, 15795220, 15542499
AT5G14750	AT2G37260	WER	TTG2	A	17766401
AT2G38470	AT3G12500	WRKY33	ATHCHIB	A	17059405
AT2G38470	AT3G23240	WRKY33	ERF1	A	17616737
AT2G38470	AT3G15210	WRKY33	ERF4	R	17616737
AT2G38470	AT5G60890	WRKY33	MYB34	R	17616737
AT2G38470	AT1G06160	WRKY33	ORA59	R	17616737
AT2G38470	AT3G26830	WRKY33	PAD3	A	18650934
AT2G38470	AT3G52430	WRKY33	PAD4	R	17059405
AT2G38470	AT2G14610	WRKY33	PR1	R	18776063, 18316638
AT2G38470	AT5G07100	WRKY33	WRKY26	A	17616737
AT4G04450	AT3G23430	WRKY42	PHO1	R	19934380
AT1G62300	AT4G04450	WRKY6	WRKY42	R	19934380, 15504732, 12000796
AT2G17950	AT4G37750	WUS	ANT	A	15004006, 12000795
